# Supplementary material for: Gene Set−Based Integrative Analysis Revealing Two Distinct Functional Regulation Patterns in Four Common Subtypes of Epithelial Ovarian Cancer
Source: MDPI journal article supplement (doi:10.3390/ijms17081272), 2016-08-05
Supplement: s1 [file s1]

## Supplementary Materials: Gene Set-Based Integrative Analysis Revealing Two Distinct Functional Regulation Patterns in Four Common Subtypes of Epithelial Ovarian Cancer

Chia-Ming Chang, Chi-Mu Chuang, Mong-Lien Wang, Yi-Ping Yang, Jen-Hua Chuang, Ming-Jie Yang, Ming-Shyen Yen, Shih-Hwa Chiou and Cheng-Chang Chang

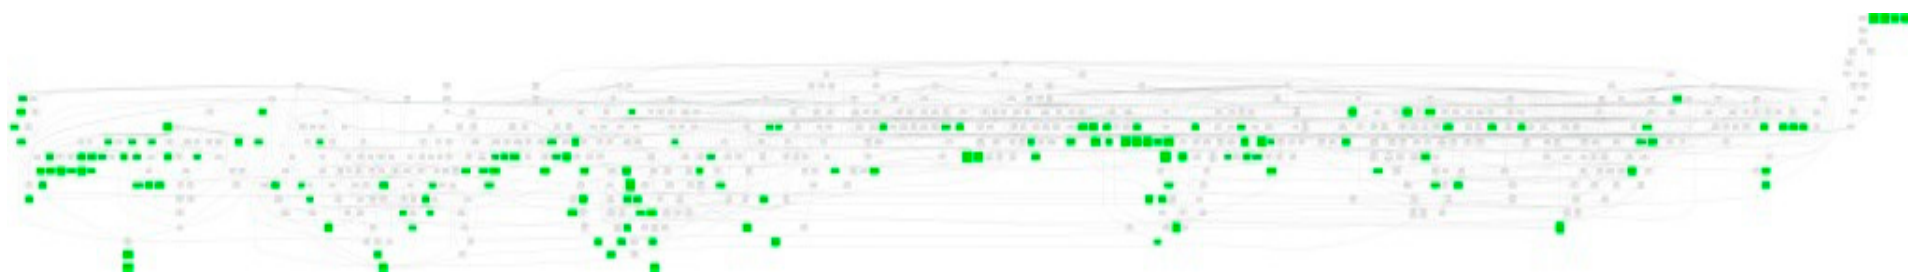

Figure S1. Tree of deregulated GO terms for clear cell carcinoma.

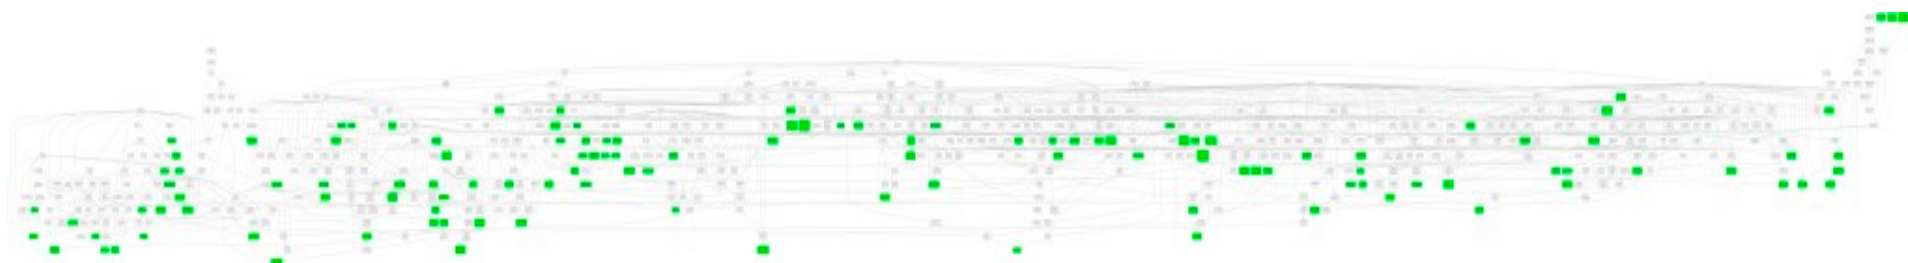

Figure S2. Tree of deregulated GO terms for endometrioid carcinoma.

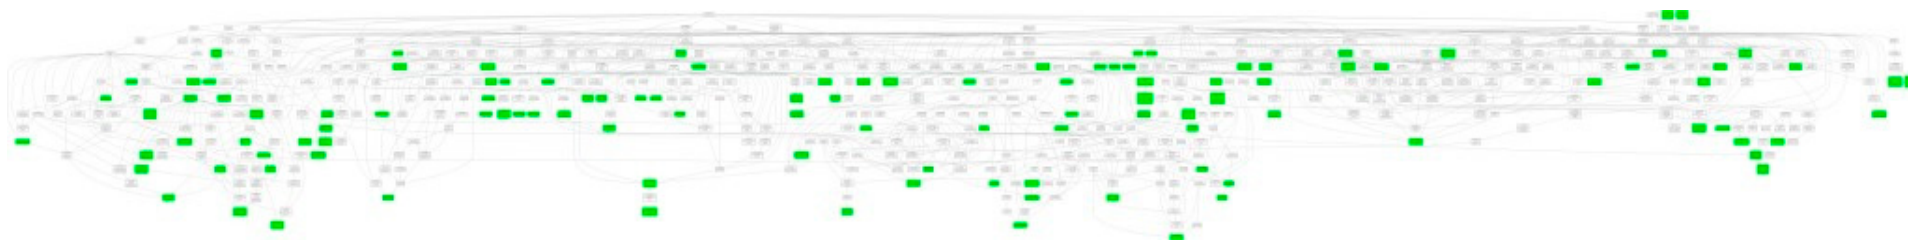

**Figure S3.** Tree of deregulated GO terms for mucinous carcinoma.

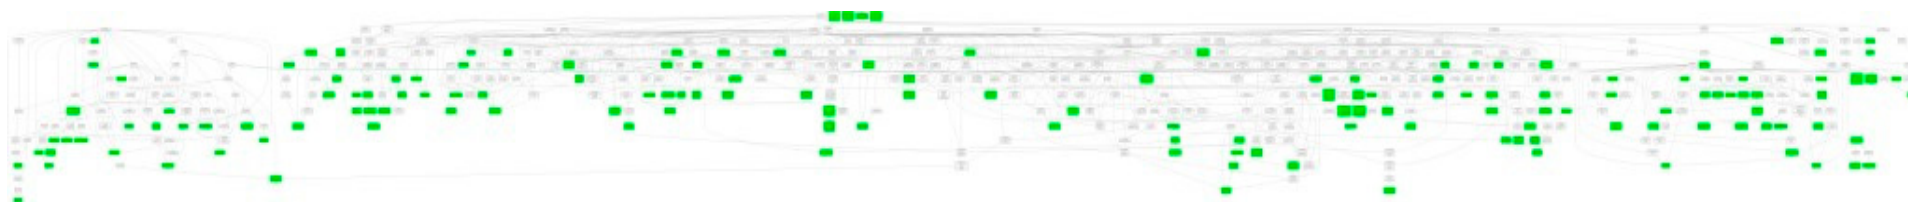

**Figure S4.** Tree of deregulated GO terms for serous carcinoma.
